# Supplementary material for: A ratiometric luminescence nanoprobe based on layered terbium hydroxide nanosheets for quantitative detection of an anthrax biomarker
Source: Royal Society of Chemistry journal article supplement (doi:10.1039/d1sd00027f), 2022-01-01
Supplement: d1sd00027f1.pdf [file d1sd00027f1.pdf]

## Supporting Information

### A Ratiometric Luminescence Nanoprobe Based on Layered Terbium Hydroxide Nanosheets for Quantitative Detection of An Anthrax Biomarker

*Jinyan Li<sup>a,b</sup>, Qingyang Gu<sup>a,b\*</sup>, Hui Heng<sup>a,b</sup>, Ziwei Wang<sup>a,b</sup>, Haibo Jin<sup>a,b</sup>, Jing He<sup>c</sup>*

a College of New Materials and Chemical Engineering, Beijing Institute of Petrochemical Technology, Beijing 102617, China

b Beijing Key Laboratory of Fuels Cleaning and Advanced Catalytic Emission Reduction Technology, Beijing 102617, China

c State Key Laboratory of Chemical Resource Engineering, Beijing University of Chemical Technology, Beijing 100029, China

\*Email: [guqingyang@bipt.edu.cn](mailto:guqingyang@bipt.edu.cn)

Table S1 Comparison of different luminescence sensors for DPA detection

| Probes                                | Range of Detection | Limit of Detection | Reference |
|---------------------------------------|--------------------|--------------------|-----------|
| CDs(EDTA)-Eu                          | 1.0-100 nM         | 190 pM             | 1         |
| CDs-Tb                                | 0.0005-1.2 μM      | 5 nM               | 8         |
| CDs(CA)-Eu                            | 0.0005-5 μM        | 0.8 nM             | 3         |
| PVA film-Eu                           | 0.1-50 μM          | --                 | 4         |
| Tb-g-C <sub>3</sub> N <sub>4</sub> NS | 0-1.5 μM           | 9.9 nM             | 31        |
| Nanosheets-Tb                         | 0-30 μM            | 44 nM              | 6         |
| LNP(Tb)                               | 1-100 μM           | 36.67 nM           | This work |

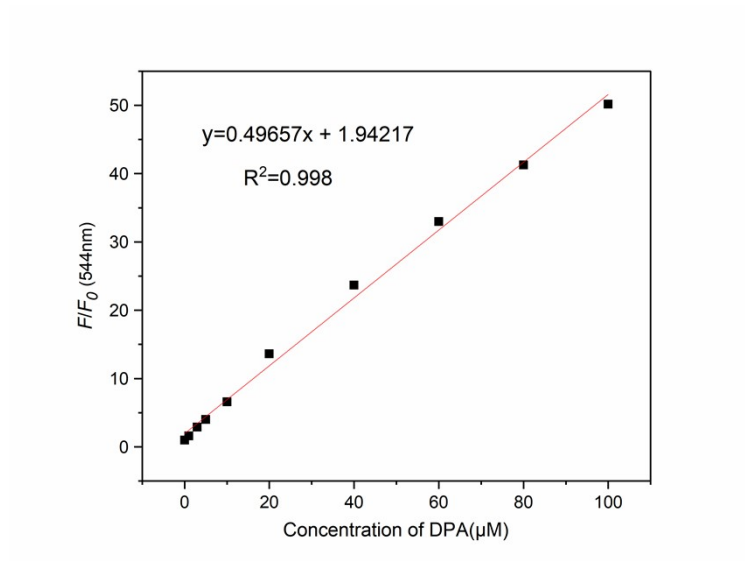

FigureS1 Linear relation between luminescence intensity at 544 nm and DPA concentration ( $\lambda_{ex}=285$  nm).
